# Supplementary material
Source: HighWire-hosted journal article supplement (https://bmjopenquality.bmj.com/highwire/filestream/135977/field_highwire_adjunct_files/1/ds1816.pdf)

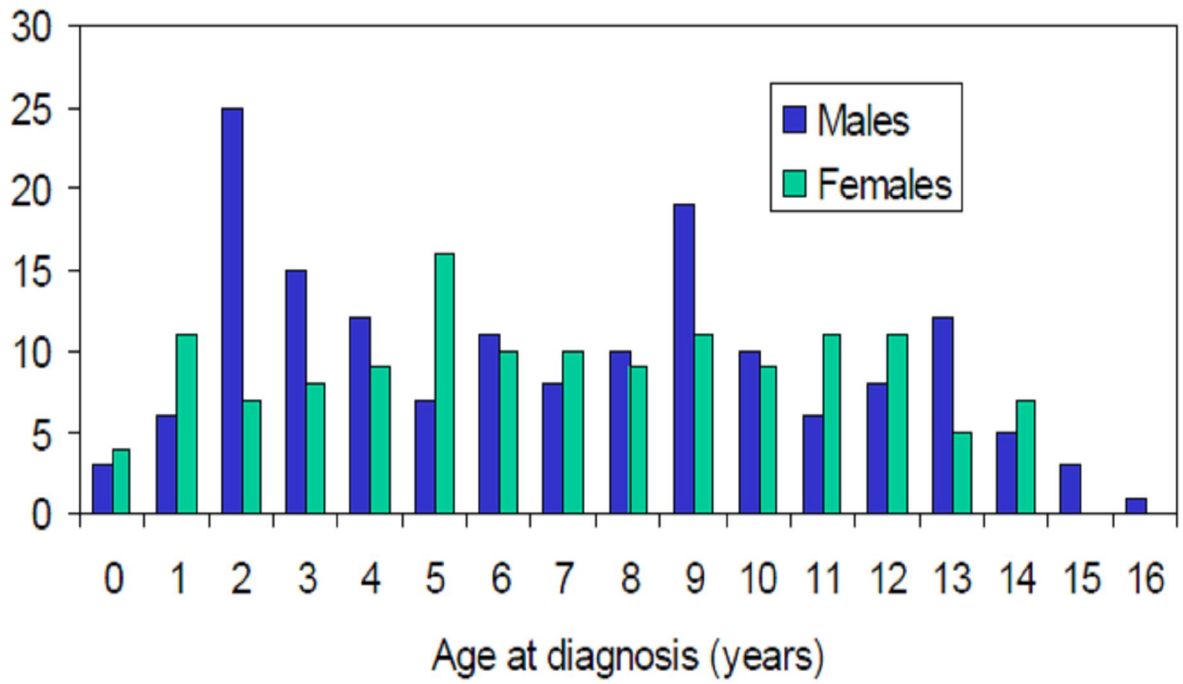

Figure 2  
Age at Diagnosis of Diabetes in all Patients in 2011/12

Supplement: ds1816.pdf [file ds1816.pdf]
